# Supplementary material for: Nitrogen Application Timing and Levels Affect the Fate and Budget of Fertilizer Nitrogen in the Apple–Soil System
Source: MDPI journal article supplement (doi:10.3390/plants13060813), 2024-03-12
Supplement: s1 [file s1]

# **Nitrogen Application Timing and Levels Affect the Fate and Budget of Fertilizer Nitrogen in the Apple–Soil System**

Fen Wang<sup>1</sup>, Chaoran Wang<sup>2</sup>, Binghao Yang<sup>1</sup>, Xinyu Luo<sup>1</sup>, Gaowei Qi<sup>1</sup>, Fajin Ji<sup>1</sup>, Xinkai Guo<sup>1</sup>, Tao Yang<sup>1</sup>, Xuehui Zhao<sup>1</sup>, Ming Li<sup>1</sup>, Qianqian Jiang<sup>1</sup>, Ling Peng<sup>3</sup> and Hui Cao<sup>1,\*</sup>

<sup>1</sup> School of Advanced Agricultural Sciences, Weifang University, Weifang, Shandong, China

<sup>2</sup> Weifang Vocational college, Weifang, 261061, Shandong, China

<sup>3</sup> Shandong Key Laboratory of Eco-Environmental Science for Yellow River Delta, Shandong University of Aeronautics, Binzhou, Shandong, China

\* Correspondence: hui5232@163.com

**‘Red Fuji’/M9T337**

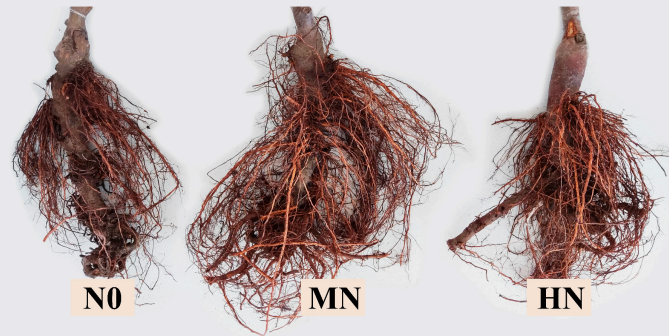

**‘Red Fuji’/*Malus hupehensis* Rehd.**

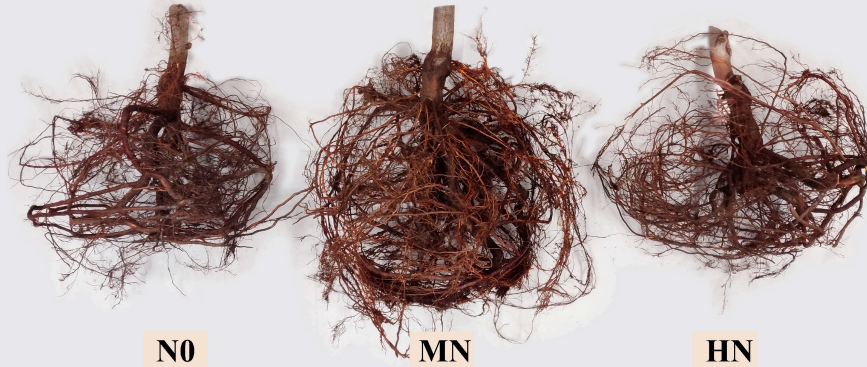

**Figure S1.** Photos of dwarf rootstock M9T337 (‘Red Fuji’/M9T337) and arborized rootstock *Malus hupehensis* Rehd. (‘Red Fuji’/*M. hupehensis* Rehd.)

**Table S1.** ANOVA analysis for the effects of studied factors (N rate and rootstock) on the biomass of apple organs. Significant ( $P < 0.05$ ) values are highlighted using bold type.

| Sources of variation | Root    |                  | Trunk   |                | Perennial branch |                  | Annual branch |                  | Leaf    |                  | Fruit   |                  |
|----------------------|---------|------------------|---------|----------------|------------------|------------------|---------------|------------------|---------|------------------|---------|------------------|
|                      | F value | <i>P</i> value   | F value | <i>P</i> value | F value          | <i>P</i> value   | F value       | <i>P</i> value   | F value | <i>P</i> value   | F value | <i>P</i> value   |
| N rate (N)           | 14.478  | <b>&lt;0.001</b> | 1.894   | 0.185          | 25.052           | <b>&lt;0.001</b> | 38.523        | <b>&lt;0.001</b> | 16.342  | <b>&lt;0.001</b> | 12.290  | <b>&lt;0.001</b> |
| Rootstock (R)        | 0.966   | 0.340            | 0.034   | 0.857          | 0.681            | 0.421            | 0.596         | 0.451            | 1.039   | 0.323            | 0.995   | 0.333            |
| N × R                | 6.114   | <b>&lt;0.01</b>  | 0.630   | 0.681          | 10.265           | <b>&lt;0.001</b> | 17.260        | <b>&lt;0.001</b> | 7.079   | <b>&lt;0.01</b>  | 5.099   | <b>&lt;0.01</b>  |

**Table S2.** ANOVA analysis for the effects of studied factors (N rate and rootstock) on annual branch length, leaf area, and chlorophyll content of apples. Significant ( $P < 0.05$ ) values are highlighted using bold type.

| Sources of variation | Annual branch length |                  | Leaf area |                  | Chlorophyll content |                 |
|----------------------|----------------------|------------------|-----------|------------------|---------------------|-----------------|
|                      | F value              | <i>P</i> value   | F value   | <i>P</i> value   | F value             | <i>P</i> value  |
| N rate (N)           | 9.586                | <b>&lt;0.001</b> | 3.699     | <b>&lt;0.05</b>  | 5.181               | <b>&lt;0.01</b> |
| Rootstock (R)        | 69.647               | <b>&lt;0.001</b> | 10.178    | <b>&lt;0.01</b>  | 2.130               | 0.15            |
| N × R                | 30.265               | <b>&lt;0.001</b> | 1.448     | <b>&lt;0.001</b> | 2.433               | <b>&lt;0.01</b> |

**Table S3.** ANOVA analysis for the effects of studied factors (N rate, DMPP application and year) on root activity and root morphology. Significant ( $P < 0.05$ ) values are highlighted using bold type.

| Sources of variation | Root activity |                  | Root length |                  | Root tips |                  | Root surface |                  | Root volume |                  |
|----------------------|---------------|------------------|-------------|------------------|-----------|------------------|--------------|------------------|-------------|------------------|
|                      | F value       | <i>P</i> value   | F value     | <i>P</i> value   | F value   | <i>P</i> value   | F value      | <i>P</i> value   | F value     | <i>P</i> value   |
| N rate (N)           | 7.863         | <b>&lt;0.001</b> | 110.884     | <b>&lt;0.001</b> | 61.494    | <b>&lt;0.001</b> | 11.713       | <b>&lt;0.001</b> | 30.260      | <b>&lt;0.001</b> |
| Rootstock (R)        | 2.807         | 0.097            | 0.874       | 0.364            | 1.666     | 0.215            | 6.876        | <b>&lt;0.05</b>  | 2.887       | 0.109            |
| N × R                | 3.794         | <b>&lt;0.01</b>  | 557.057     | <b>&lt;0.001</b> | 312.866   | <b>&lt;0.001</b> | 25.344       | <b>&lt;0.001</b> | 56.584      | <b>&lt;0.001</b> |

**Table S4.** ANOVA analysis for the effects of studied factors (N rate and rootstock) on %Ndff-

SP, %Ndff-SU and %Ndffs. SP and SU represent <sup>15</sup>N application in spring and summer,

respectively. Significant ( $P < 0.05$ ) values are highlighted using bold type.

| Sources of variation | %Ndff-SP |                 | %Ndff-SU |                 | %Ndffs  |                 |
|----------------------|----------|-----------------|----------|-----------------|---------|-----------------|
|                      | F value  | <i>P</i> value  | F value  | <i>P</i> value  | F value | <i>P</i> value  |
| N rate (N)           | 6.180    | <b>&lt;0.05</b> | 5.351    | <b>&lt;0.05</b> | 6.244   | <b>&lt;0.05</b> |
| Rootstock (R)        | 0.456    | 0.502           | 0.829    | 0.366           | 0.679   | 0.413           |
| N × R                | 2.176    | 0.099           | 2.049    | 0.115           | 2.284   | 0.087           |

**Table S5.** ANOVA analysis for the effects of studied factors (N rate and rootstock) on utilization rate, residual rate, and loss rate of fertilizer<sup>15</sup>N. SP and SU represent <sup>15</sup>N application in spring and summer, respectively. Significant ( $P < 0.05$ ) values are highlighted using bold type.

| Sources of variation | <sup>15</sup> N utilization rate-SP |                  | <sup>15</sup> N utilization rate-SU |                  | <sup>15</sup> N residual rate-SP |                  | <sup>15</sup> N residual rate-SU |                  | <sup>15</sup> N loss rate-SP |                  | <sup>15</sup> N loss rate-SU |                  |
|----------------------|-------------------------------------|------------------|-------------------------------------|------------------|----------------------------------|------------------|----------------------------------|------------------|------------------------------|------------------|------------------------------|------------------|
|                      | F value                             | <i>P</i> value   | F value                             | <i>P</i> value   | F value                          | <i>P</i> value   | F value                          | <i>P</i> value   | F value                      | <i>P</i> value   | F value                      | <i>P</i> value   |
| N rate (N)           | 17.678                              | <b>&lt;0.01</b>  | 4.618                               | 0.057            | 25.947                           | <b>&lt;0.001</b> | 52.699                           | <b>&lt;0.001</b> | 105.663                      | <b>&lt;0.001</b> | 21.393                       | <b>&lt;0.001</b> |
| Rootstock (R)        | 5.361                               | <b>&lt;0.05</b>  | 20.309                              | <b>&lt;0.001</b> | 3.342                            | 0.097            | 14.012                           | <b>&lt;0.01</b>  | 0.275                        | 0.612            | 3.185                        | 0.105            |
| N × R                | 524.419                             | <b>&lt;0.001</b> | 275.970                             | <b>&lt;0.001</b> | 97.002                           | <b>&lt;0.001</b> | 19.009                           | <b>&lt;0.001</b> | 43.460                       | <b>&lt;0.001</b> | 33.937                       | <b>&lt;0.001</b> |

**Table S6.** ANOVA analysis for the effects of studied factors (N rate and rootstock) on utilization, residue, and loss of fertilizer N. SP and SU represent N application in spring and summer, respectively. Significant ( $P < 0.05$ ) values are highlighted using bold type.

| Sources of variation | Utilization-SP |                  | Utilization-SU |                  | Residue-SP |                  | Residue-SU |                  | Loss-SP  |                  | Loss-SU |                  |
|----------------------|----------------|------------------|----------------|------------------|------------|------------------|------------|------------------|----------|------------------|---------|------------------|
|                      | F value        | <i>P</i> value   | F value        | <i>P</i> value   | F value    | <i>P</i> value   | F value    | <i>P</i> value   | F value  | <i>P</i> value   | F value | <i>P</i> value   |
| N rate (N)           | 1.311          | 0.279            | 3.116          | 0.108            | 136.184    | <b>&lt;0.001</b> | 194.717    | <b>&lt;0.001</b> | 3932.190 | <b>&lt;0.001</b> | 333.302 | <b>&lt;0.001</b> |
| Rootstock (R)        | 65.453         | <b>&lt;0.001</b> | 28.803         | <b>&lt;0.001</b> | 0.636      | 0.444            | 0.427      | 0.528            | 0.018    | 0.896            | 0.248   | 0.629            |
| N × R                | 191.449        | <b>&lt;0.001</b> | 280.645        | <b>&lt;0.001</b> | 356.014    | <b>&lt;0.001</b> | 861.678    | <b>&lt;0.001</b> | 3644.276 | <b>&lt;0.001</b> | 548.569 | <b>&lt;0.001</b> |



**Table S7.** ANOVA analysis for the effects of studied factors (N rate and rootstock) on MBN-SP

and MBN-SU. SP and SU represent  $^{15}\text{N}$  application in spring and summer, respectively.

Significant ( $P < 0.05$ ) values are highlighted using bold type.

| Sources of variation | MBN-SP  |                 | MBN-SU  |                  |
|----------------------|---------|-----------------|---------|------------------|
|                      | F value | <i>P</i> value  | F value | <i>P</i> value   |
| N rate (N)           | 14.701  | <b>&lt;0.01</b> | 19.952  | <b>&lt;0.001</b> |
| Rootstock (R)        | 0.398   | 0.542           | 1.039   | 0.332            |
| N $\times$ R         | 4.646   | <b>&lt;0.05</b> | 8.943   | <b>&lt;0.01</b>  |

**Table S8.** Chemical properties of experimental soil.

| Soil parameters                                                                 |       |
|---------------------------------------------------------------------------------|-------|
| pH (1:2.5 water extract)                                                        | 7.87  |
| EC (1:5 water exact; dS m <sup>-1</sup> )                                       | 0.65  |
| Organic matter (Walkley-Black; g kg <sup>-1</sup> )                             | 18.23 |
| Alkali-hydrolyzed N (Alkaline hydrolysis diffusion method; g kg <sup>-1</sup> ) | 0.07  |
| Available phosphorus (Olsen; sodium bicarbonate extract; g kg <sup>-1</sup> )   | 0.04  |
| Available potassium (Ammonium acetate extract; g kg <sup>-1</sup> )             | 0.22  |
| Exchangeable calcium (Ammonium acetate extract; g kg <sup>-1</sup> )            | 0.49  |
| Exchangeable magnesium (Ammonium acetate extract; g kg <sup>-1</sup> )          | 0.08  |

Note: Soil parameters are all based on soil dry weight.

**Table S9.** Nutrient content of chemical fertilizer.

| Fertilizers            | Nutrients                                 |
|------------------------|-------------------------------------------|
| Urea                   | 46% $^{14}\text{N}$                       |
| $^{15}\text{N}$ -urea  | 46% $^{15}\text{N}$                       |
| Calcium superphosphate | 14% $\text{P}_2\text{O}_5$ , 13% Ca, 8% S |
| Potassium sulfate      | 50% $\text{K}_2\text{O}$ , 18% S          |
